# Supplementary material
Source: publisher figshare collection journal article supplement (https://sage.figshare.com/ndownloader/files/21208182)

# Graphic Abstracts

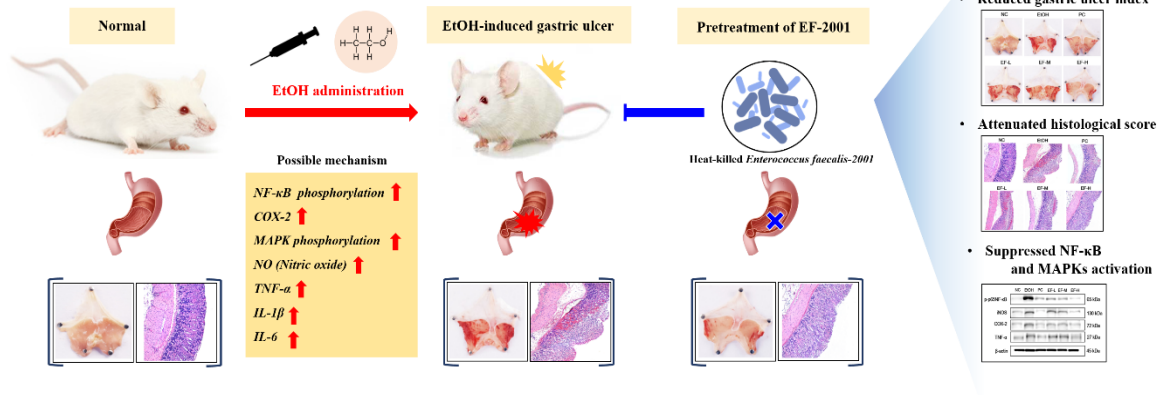

Supplement: Supplementary file 1 [file 21208182]
